# Supplementary material for: Identification of Hepatitis E Virus Genotypes 3 and 7 in Israel: A Public Health Concern?
Source: MDPI journal article supplement (doi:10.3390/v13112326), 2021-11-22
Supplement: s1 [file s1]

## Supplementary materials

**Table S1. Primers used to amplify hepatitis E viral genome of genotype 3 and 7.**

| Virus Targeted | Sequence (5'-3')                      | Position  | Polarity  | Reference                                                                               |
|----------------|---------------------------------------|-----------|-----------|-----------------------------------------------------------------------------------------|
| HEV-3          | ATGTARTCACGGCCDGA CTTC TC             | 1302–1279 | antisense | <i>Bo Wang et al. (2018)</i> <sup>1</sup> and unpublished primers received from Bo Wang |
| HEV-3, HEV-7   | TCTAATGGCCTGGACTGTACTG                | 1894–1915 | sense     |                                                                                         |
| HEV-3          | ACYTGGTCHACATCTGGYTTYTC               | 2139–2161 | sense     |                                                                                         |
| HEV-3          | TAYCCTGATGGRG CYAAGGTGT               | 2995–2973 | sense     |                                                                                         |
| HEV-3          | TTAACCARCCARTCACARTCYGAYTCAA          | 3037–3009 | antisense |                                                                                         |
| HEV-3          | TGRACCGATGAGGCKCGCTGCAT               | 3200-3222 | antisense |                                                                                         |
| HEV-3, HEV-7   | TACCACCAGCTKGCTGAGGAG                 | 3751-3771 | sense     |                                                                                         |
| HEV-3          | ATGGAGGAGTGTGGCATGC                   | 4465-4483 | sense     |                                                                                         |
| HEV-3, HEV-7   | GCCATGTTCCAGACDGTRTTCCA               | 4622-4600 | antisense |                                                                                         |
| HEV-3          | GAAGGGGTTGGTTGGATG                    | 5332-5315 | antisense |                                                                                         |
| HEV-3          | TTCATCCAACCAACCCCT                    | 5367-5383 | sense     | <i>Garson et al. (2012)</i> <sup>2</sup>                                                |
| HEV-3          | AATTATGCYCAGTAYCGRGTTG                | 5783-5804 | sense     | <i>Huang et al. (2002)</i> <sup>3</sup>                                                 |
| HEV-3          | GTATGCTYTCATWCATGGCT                  | 6068-6089 | sense     |                                                                                         |
| HEV-3          | AGCCGACGAAATCAATTCTGTC                | 6394-6415 | antisense |                                                                                         |
| HEV-3          | CCCTTRTCYTGCTGWGCATTCTC               | 6491-6513 | antisense |                                                                                         |
| HEV-7          | AYAACCATGATGTTGCCATACT                | 742-763   | sense     | <i>Lee GH et al. (2016)</i> <sup>4</sup>                                                |
| HEV-7          | GTAAAACGACGGCCAGGGTAGACCACGTACGTTGCT  | 2103-2122 | antisense |                                                                                         |
| HEV-7          | TCGCCGAATCATATCTGGGA                  | 2103-2122 | sense     |                                                                                         |
| HEV-7          | AGGGGATGAGCTTTATCTSA                  | 2798-2817 | sense     |                                                                                         |
| HEV-7          | TSAGATAAAGCTCATCCCCT                  | 2798-2817 | antisense |                                                                                         |
| HEV-7          | TACWATCATTGCCACAGCTGA                 | 3527-3547 | sense     |                                                                                         |
| HEV-7          | TCAGCTGTGGCAATGATWGTA                 | 3527-3547 | antisense |                                                                                         |
| HEV-7          | TATATTCATCCAACCAACCCAT                | 5334-5375 | sense     |                                                                                         |
| HEV-7          | ATGGGTTGGTTGGATGAATATA                | 5334-5375 | antisense |                                                                                         |
| HEV-7          | TTGATATGAATTCAATYACTTCGA              | 5856-5879 | sense     |                                                                                         |
| HEV-7          | TCGAAGTRATTGAATTCATATCAA              | 5856-5879 | antisense |                                                                                         |
| HEV-7          | ACGAAATCAATTCTGTGCGGA                 | 6339-6359 | antisense |                                                                                         |
| HEV-7          | CAGGAAACAGCTATGACTTTTCAGGGAGCGCGAAACG | 7226-7262 | antisense |                                                                                         |
| HEV-3, HEV-7   | TAGGCAGACCACRTATGTGGTCGSTGCATGGA      | 1-990     | sense     |                                                                                         |
| HEV-3, HEV-7   | GCCGGTCCCAGATRTGSACCGGRA              | 1-990     | antisense |                                                                                         |
| HEV-3          | ACGAATGTGCGCAGGTYTGTGT                | 5003-6484 | sense     | <i>Legrand-Abravanel F et al. (2009)</i> <sup>5</sup>                                   |

|              |                           |           |           |                                             |
|--------------|---------------------------|-----------|-----------|---------------------------------------------|
| HEV-7        | TTTATTCTCGTCCAGTCGTTTC    | 6358-6379 | sense     | <i>P.C.Y Woo et al (2014)</i> <sup>6</sup>  |
| HEV-7        | GTCAGTGGAGGACCCATATGT     | 6620-6641 | antisense |                                             |
| HEV-3, HEV-7 | CTGGCATYACWACTGCTGATTGAGC | 56-79     | sense     | <i>Schlauder et al. (1999)</i> <sup>7</sup> |
| HEV-3, HEV-7 | CCATCRARRCAGTAAGTGCGGTC   | 473-451   | antisense |                                             |
| HEV-3        | TCTACATTTTCATGCTGTWCCGGT  | 958-980   | sense     | <i>This study</i> *                         |
| HEV-3, HEV-7 | CTGCCATCAGCGCTACCTNCGWAC  | 1170-1193 | sense     |                                             |
| HEV-3        | TGTGGYCAYGATAACGAGGCCT    | 1513-1534 | sense     |                                             |
| HEV-3        | AGGCCTCGTTATCRTGRCCACA    | 1513-1534 | antisense |                                             |
| HEV-3, HEV-7 | GGGTTGAGCAGAACCCYAAGAGG   | 2696-2718 | sense     |                                             |
| HEV-3, HEV-7 | CGATGGTTACGCTCCCAGGC      | 2774-2793 | antisense |                                             |
| HEV-3        | TACTGCGTGAGGTCGGCATT      | 3260-3659 | sense     |                                             |
| HEV-3        | CCTTCTCMACCATAGCCTC       | 4132-4150 | antisense |                                             |
| HEV-3        | GCTTGAAGAYACYATTGA        | 7022-7039 | sense     |                                             |
| HEV-3        | TAATTAAGACTCCCGGGT        | 7164-7181 | antisense |                                             |
| HEV-7        | CTAGCTGGTGGCACGTTACCC     | 3290-3310 | sense     |                                             |
| HEV-7        | CATGARGCGCAGGGRGCGAC      | 3479-3494 | sense     |                                             |
| HEV-7        | CAATGGACTATATCAGTGAGC     | 3915-3935 | antisense |                                             |
| HEV-7        | CTAGTTGGCAGATATGGC        | 3979-3996 | sense     |                                             |
| HEV-7        | ATAGCGCATTGTTATGAGTTCC    | 4654-4675 | sense     |                                             |
| HEV-7        | CAAGACGAAGCTGTTACGC       | 4915-4933 | antisense |                                             |
| HEV-7        | CTTGCGGYGACCAATCCC        | 5428-5445 | sense     |                                             |
| HEV-7        | ACCAGTATAGGGTGTATTA       | 6038-6056 | antisense |                                             |

\* Primer positions in this study are based on GenBank accession numbers AB369687 for HEV-3 sequences and KJ496143 for HEV-7 sequences

**Table S2. IgG and HEV-RNA results in serum from dormitory camels**

| Tribe/Location      | Collection year | Gender (F/M) | Estimated age (Year) | Number of sera from camels | IgG Positive (n) | RNA Positive (n) |
|---------------------|-----------------|--------------|----------------------|----------------------------|------------------|------------------|
| Mas'udein el-Azazme | 2018            | 12F; 1M      | 3                    | 13                         | 7                | 0                |
|                     |                 | F            | 3                    | 10                         | 9                | 0                |
|                     |                 | F            | 3                    | 4                          | 0                | 0                |
|                     |                 | F            | 3                    | 3                          | 0                | 0                |
|                     |                 | 6F;1M        | 3                    | 7                          | 4                | 0                |
| Abu Rakeek          | 2018            | F            | 3                    | 5                          | 0                | 0                |
|                     |                 | F            | 3                    | 5                          | 1                | 0                |
| Kfar Adumim         | 2018            | 10F; 1M      | Unknown              | 11                         | 8                | 0                |
| Atrash              | 2018            | 5F; 1M       | 6                    | 5                          | 2                | 0                |
| Mas'udein el-Azazme | 2018            | 22F; 1M      | 1                    | 23                         | 18               | 1 (Ct= 27.4 )    |
| Segev Shalom        | 2018            | F            | 6                    | 3                          | 0                | 0                |
|                     |                 | F            |                      | 3                          | 0                | 1                |
| Tel Sheva           | 2018            | 3F; 1M       | 6                    | 4                          | 2                | 0                |
|                     |                 | F            | 3                    | 2                          | 0                | 0                |
| Yeruham             | 2018            | F            | 3                    | 9                          | 8                | 0                |
|                     |                 | F            | 3                    | 3                          | 3                | 0                |
| Arad                | 2018            | F            | 6                    | 0                          | 0                | 0                |
|                     |                 | F            | 6                    | 1                          | 0                | 0                |
|                     |                 | F            | 6                    | 2                          | 0                | 0                |
| Hawashla            | 2018            | F            | 6                    | 4                          | 3                | 0                |
| Ze'elim             | 2018            | F            | 3                    | 1                          | 0                | 0                |
| Uum batin           | 2018            | F            | 3                    | 7                          | 5                | 0                |
| Ar'ara              | 2018            | 5F; 1M       | 6                    | 5                          | 3                | 0                |
| Unknown             | 2018            | F            | 6                    | 3                          | 0                | 0                |
| Abu Rbei'a          | 2018            | F            | 3                    | 3                          | 2                | 0                |
| Kseifa              | 2018            | F            | 3                    | 6                          | 2                | 0                |

## References:

1. Wang B, Harms D, Papp CP, Niendorf S, Jacobsen S, Lütgehetmann M, Pischke S, Wedermeyer H, Hofmann J, Bock CT. **Comprehensive Molecular Approach for Characterization of Hepatitis E Virus Genotype 3 Variants.** J Clin Microbiol. 2018 Apr 25;56(5):e01686-17. doi: 10.1128/JCM.01686-17. PMID: 29514938; PMCID: PMC5925713.
2. Garson JA, Ferns RB, Grant PR, Ijaz S, Nastouli E, Szypulska R, Tedder RS. **Minor groove binder modification of widely used TaqMan probe for hepatitis E virus reduces risk of false negative real-time PCR results.** J Virol Methods. 2012 Dec;186(1-2):157-60. doi: 10.1016/j.jviromet.2012.07.027. Epub 2012 Jul 31. Erratum in: J Virol Methods. 2014 Dec;209:143. PMID: 22871672.
3. Huang FF, Haqshenas G, Guenette DK, Halbur PG, Schommer SK, Pierson FW, Toth TE, Meng XJ. **Detection by reverse transcription-PCR and genetic characterization of field isolates of swine hepatitis E virus from pigs in different geographic regions of the United States.** J Clin Microbiol. 2002 Apr;40(4):1326-32. doi: 10.1128/JCM.40.4.1326-1332.2002. PMID: 11923352; PMCID: PMC140370. Detection by Reverse Transcription-PCR and Genetic Characterization of Field Isolates of Swine Hepatitis E Virus from Pigs in Different Geographic Regions of the United States
4. Lee GH, Tan BH, Teo EC, Lim SG, Dan YY, Wee A, Aw PP, Zhu Y, Hibberd ML, Tan CK, Purdy MA, Teo CG. **Chronic Infection with Camelid Hepatitis E Virus in a Liver Transplant Recipient Who Regularly Consumes Camel Meat and Milk.** Gastroenterology. 2016 Feb; 150(2):355-7.e3. doi: 10.1053/j.gastro.2015.10.048. Epub 2015 Nov 6. PMID: 26551551.
5. Legrand-Abravanel F, Mansuy JM, Dubois M, Kamar N, Peron JM, Rostaing L, Izopet J. **Hepatitis E virus genotype 3 diversity, France.** Emerg Infect Dis. 2009 Jan; 15(1):110-4. doi: 10.3201/eid1501.080296. PMID: 19116067; PMCID: PMC2660688.
6. Woo PC, Lau SK, Teng JL, Tsang AK, Joseph M, Wong EY, Tang Y, Sivakumar S, Xie J, Bai R, Wernery R, Wernery U, Yuen KY. **New hepatitis E virus genotype in camels, the Middle East.** Emerg Infect Dis. 2014 Jun; 20(6):1044-8. doi: 10.3201/eid2006.140140. PMID: 24856611; PMCID: PMC4036782.
7. Schlauder GG, Desai SM, Zanetti AR, Tassopoulos NC, Mushahwar IK. **Novel hepatitis E virus (HEV) isolates from Europe: evidence for additional genotypes of HEV.** J Med Virol. 1999 Mar; 57(3):243-51. doi: 10.1002/(sici)1096-9071(199903)57:3<243::aid-jmv6>3.0.co;2-r. PMID: 10022795.
